# Supplementary material
Source: ML conference proceedings conference paper supplement (https://openaccess.thecvf.com/content/CVPR_2020/html/Yu_HUMBI_A_Large_CVPR_2020_paper.html)
Supplement: Supplementary file 2 [file Yu_HUMBI_A_Large_CVPR_2020_supplemental.zip]

Archive with 2 entries (2 files):
- 01022-supp.pdf
- 01022-supp.mp4
